# Supplementary material for: Long-term effectiveness of live herpes zoster vaccine in patients with rheumatoid arthritis subsequently treated with tofacitinib
Source: PubMed Central journal article supplement — Ann Rheum Dis. 2020 Mar 11;79(5):669–71. doi: 10.1136/annrheumdis-2019-216566 (PMC7213307; doi:10.1136/annrheumdis-2019-216566), 2020-03-11
Supplement: annrheumdis-2019-216566supp001.pdf [file annrheumdis-2019-216566supp001.pdf]

Figure S1 CONSORT flow diagram

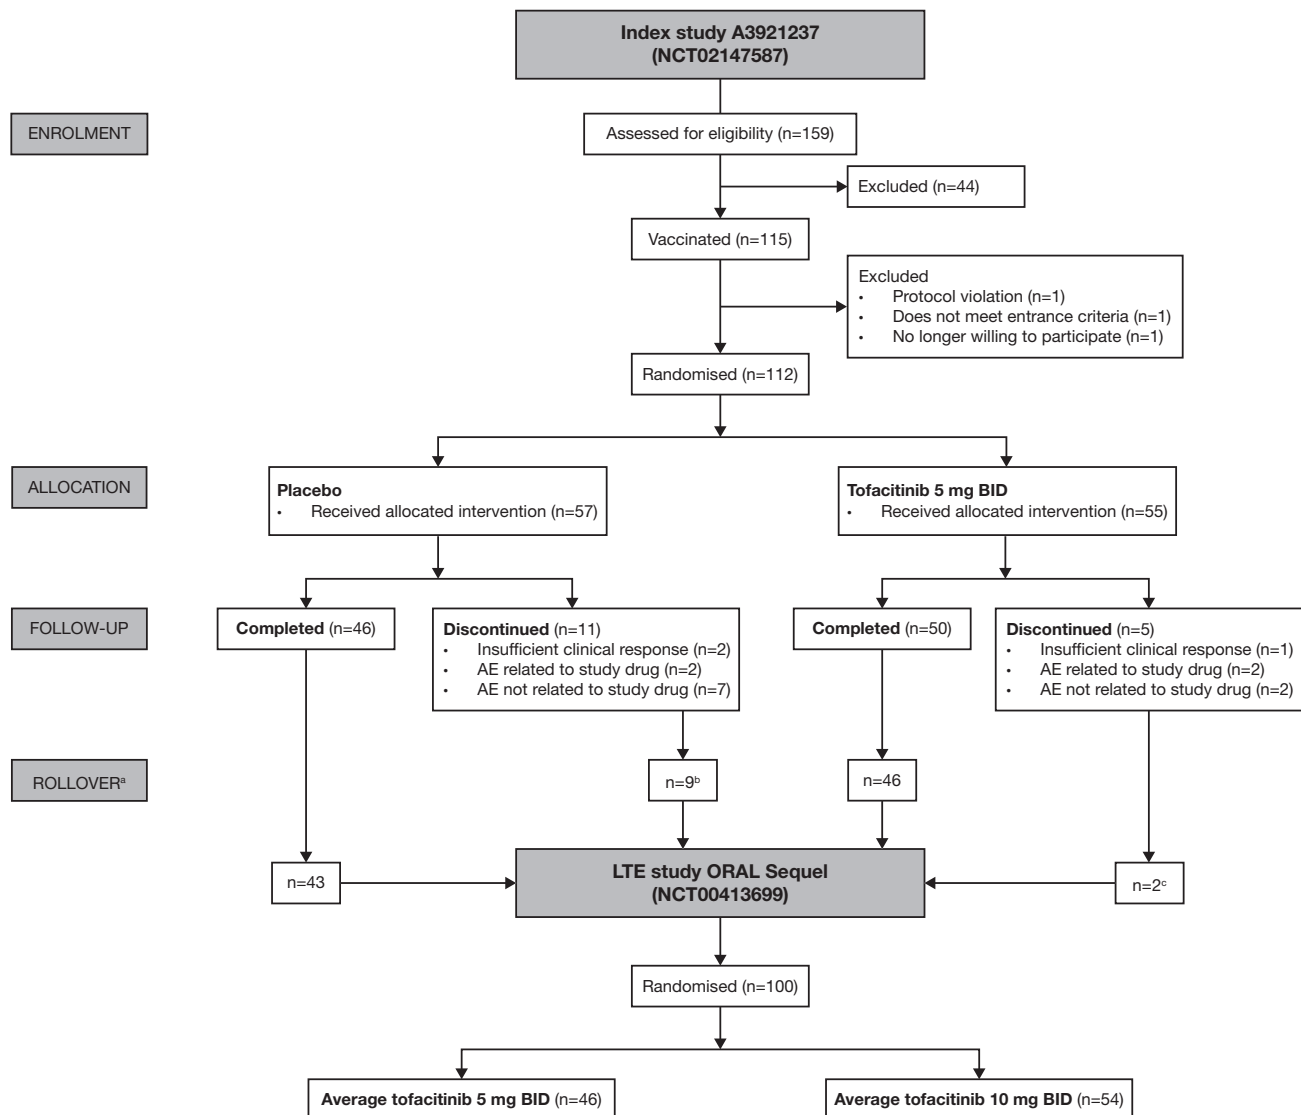

<sup>a</sup>In total, 12 patients from Study A3921237 did not roll over into ORAL Sequel; reasons for non-participation: investigator decision (n=2); patient no longer willing to participate (n=4); patient had serious AE (n=2); other reason (e.g. patient resides too far from study site; n=4);

<sup>b</sup>Includes two patients who discontinued due to insufficient clinical response and seven patients who discontinued due to AEs;

<sup>c</sup>Includes one patient who discontinued due to insufficient clinical response and one patient who discontinued due to AEs

AE, adverse event; BID, twice daily; LTE, long-term extension
